# Supplementary material for: Dense r-Ru/FeCoP heterointerfaces induced by a defect-assisted strategy for ultrastable alkaline overall water splitting
Source: Royal Society of Chemistry journal article supplement (doi:10.1039/d3nr05786k), 2024-01-01

## Supporting Information

### Experiment Section

**Materials characterizations.** X-ray diffraction (XRD) was used to characterize the crystallographic information and interlayer spacing of all catalysts on the X'Pert PRO MPD instrument with a scanning rate of  $5^{\circ} \text{ min}^{-1}$  and a  $2\theta$  range of  $3\text{-}95^{\circ}$ . Scanning electron microscopy (SEM) images were used to characterize the morphology and nanostructures of all catalysts on the Hitachi S-4800 instrument. The morphology and elemental distribution of the catalyst were characterized by transmission electron microscopy (TEM) and the corresponding elemental energy dispersive X-rays (EDX) elemental mapping on a JEM-F200 instrument with an acceleration voltage of 20 kV. X-ray photoelectron spectroscopy (XPS) was used to study the valence state of the catalyst using AXIS SUPRA at 15 mA and 14 kV monochromatic Al K $\alpha$  sources.

**Electrochemical measurements.** All electrochemical tests were performed at the Gamry Reference 3000 electrochemical station, and a three-electrode system was set up in 1.0 M KOH for testing. The saturated calomel electrode (SCE) and graphite electrode were used as reference electrodes and counter electrodes, respectively. The working electrode was the synthetic catalyst for this load. The carbon paper was ultrasonically treated with ethanol and deionized water three times before use. In this work, all measured potentials are regulated by a reversible hydrogen electrode (RHE), calculated by the correlation formula  $E(\text{RHE}) = E(\text{SCE}) + 0.24 \text{ V} + 0.0592 \cdot \text{pH}$ . All electrochemical properties were tested by linear sweep voltammetry (LSV), and the LSV data curve was obtained at a scan rate of  $5 \text{ mV s}^{-1}$ . To test the charge transfer rate of the catalyst, electrochemical impedance spectroscopy (EIS) measurements were performed in the frequency window range of  $0.1 \sim 100 \text{ kHz}$ , and voltages of 1.219 V and 0.5 V were applied to the HER and OER tests, respectively. The cyclic voltammetry (CV) test was measured in the non-Faraday part. In this work, the scanning speed of the CV was set to 40 to  $200 \text{ mV s}^{-1}$ . The long-term stability test was performed by the chronoamperometry i-t method.

Supporting Figures and Tables

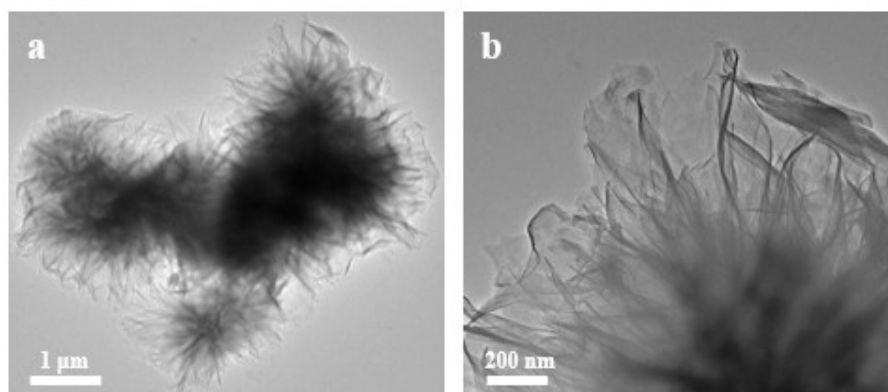

**Fig. S1** TEM images of FeCo-LDH

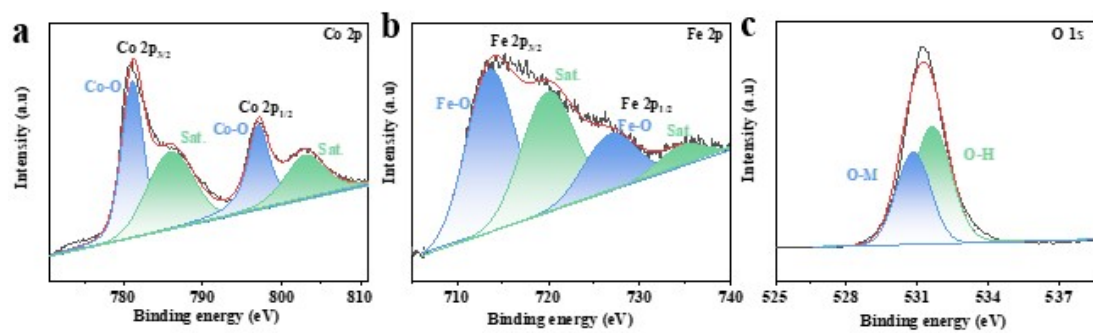

**Fig. S2** (a) Co 2p, (b) Fe 2p, and (c) O 1s XPS spectra of FeCo-LDH.

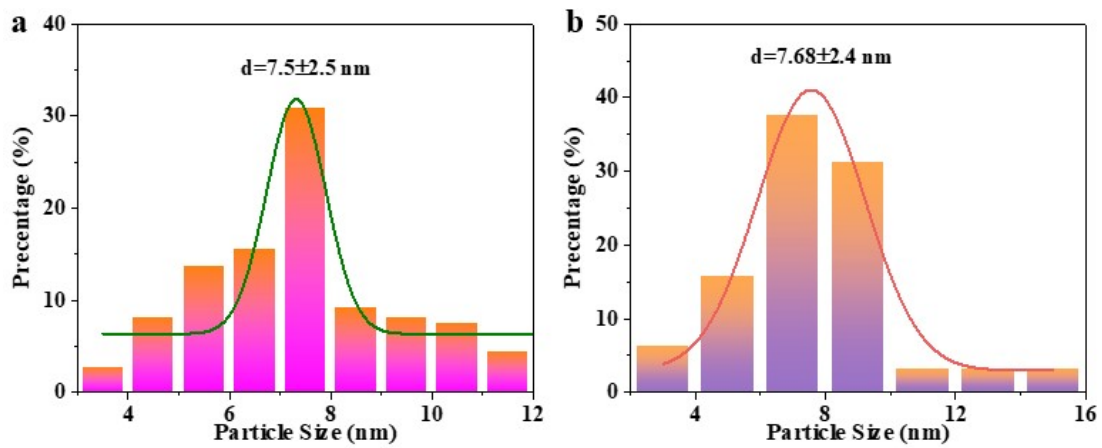

**Fig.S3** (a) Size distribution diagram of Ru NPs on FeCo-LDH nanosheets. (b) Size distribution diagram of Ru NPs on FeCoP nanosheets.

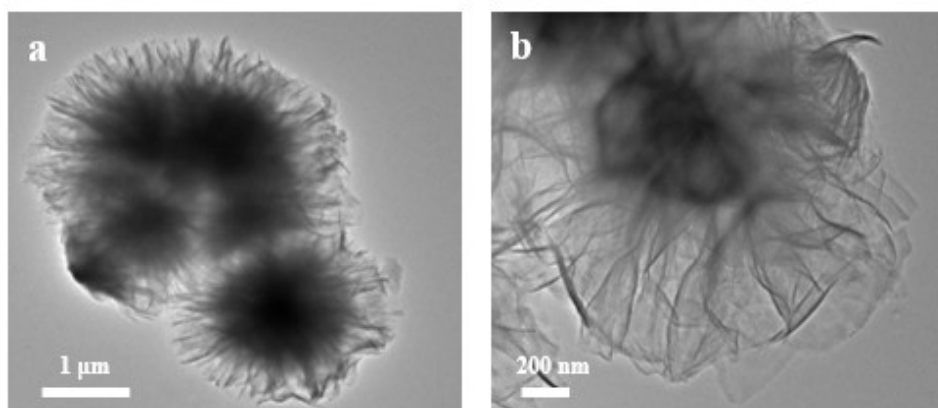

**Fig. S4** TEM images of FeCoP.

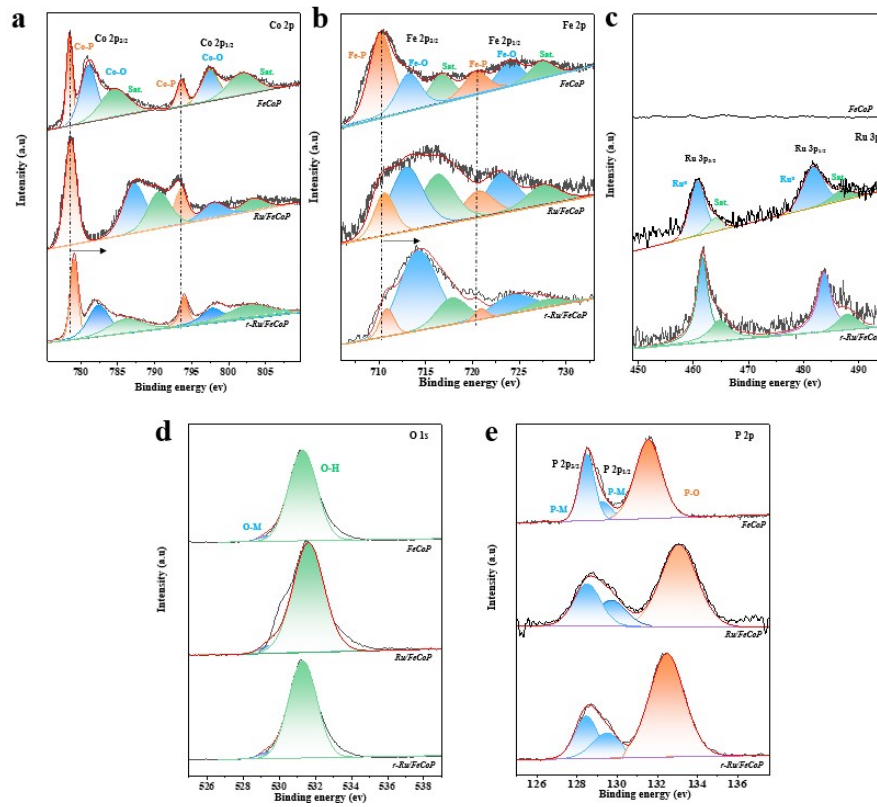

**Fig. S5** (a) Co 2p, (b) Fe 2p, (c) Ru 3p, (d) O 1s, and (e) P 2p XPS spectra of r-Ru/FeCoP, Ru/FeCoP and FeCoP.

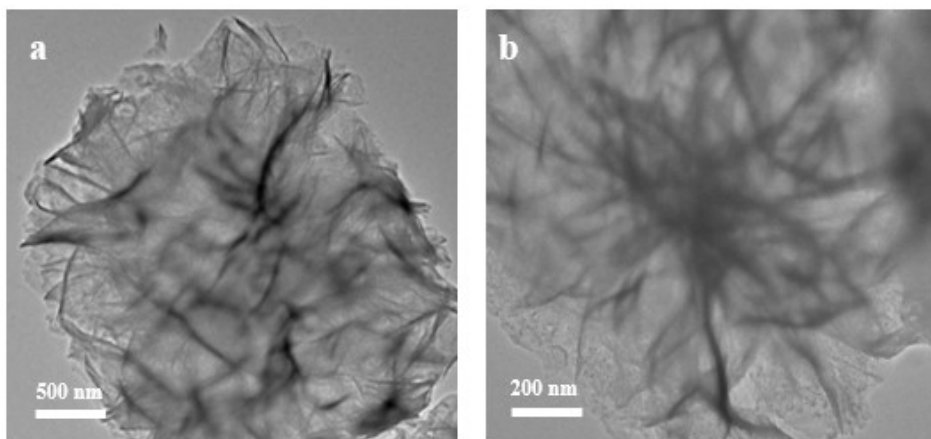

**Fig. S6** TEM images of Ru/FeCoP.

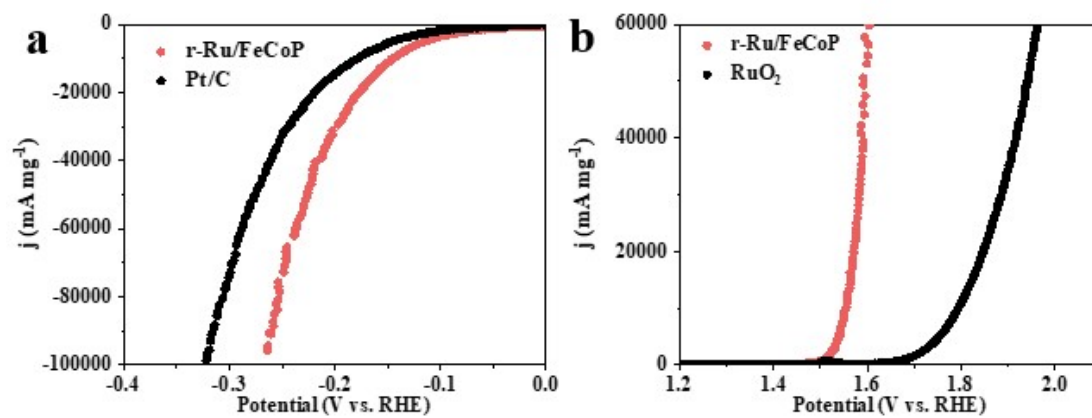

**Fig.S7** (a) mass activity of r-Ru/FeCoP and Pt/C for HER in 1.0 M KOH. (b) mass activity of r-Ru/FeCoP and RuO<sub>2</sub> for OER in 1.0 M KOH.



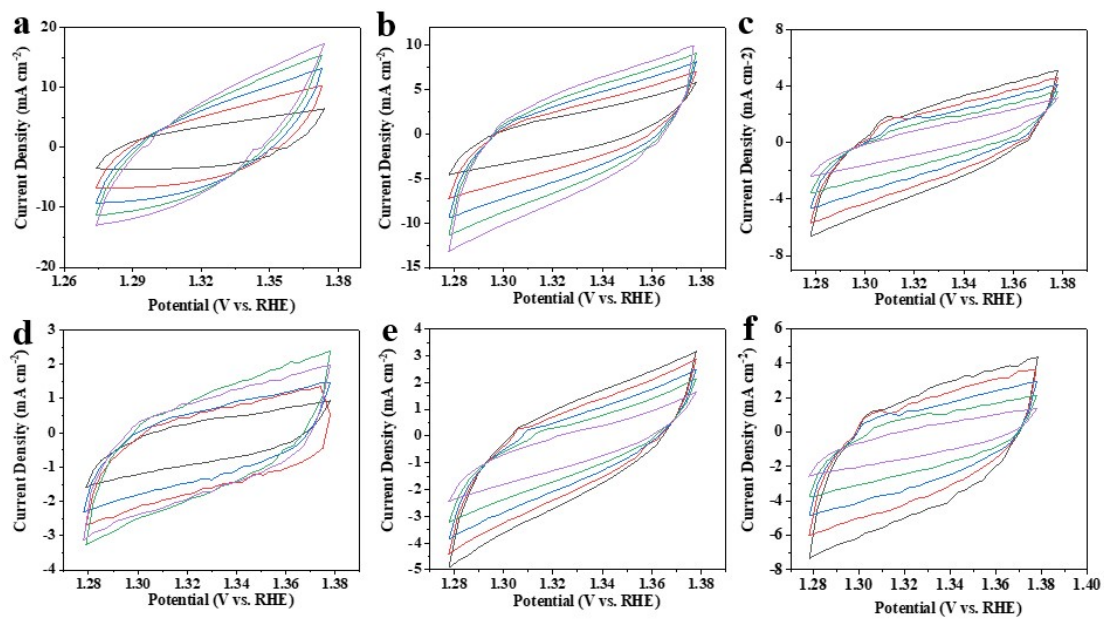

**Fig. S8** Cyclic voltammograms of (a) r-Ru/FeCoP, (b) r-Ru/FeCo-LDH, (c) Ru/FeCoP, (d) FeCoP, (e) r-Ru/FeCoP-1h, (f) r-Ru/FeCoP-3h at 1.26-1.38 V vs RHE at 40-200  $\text{mV s}^{-1}$  scan rate.

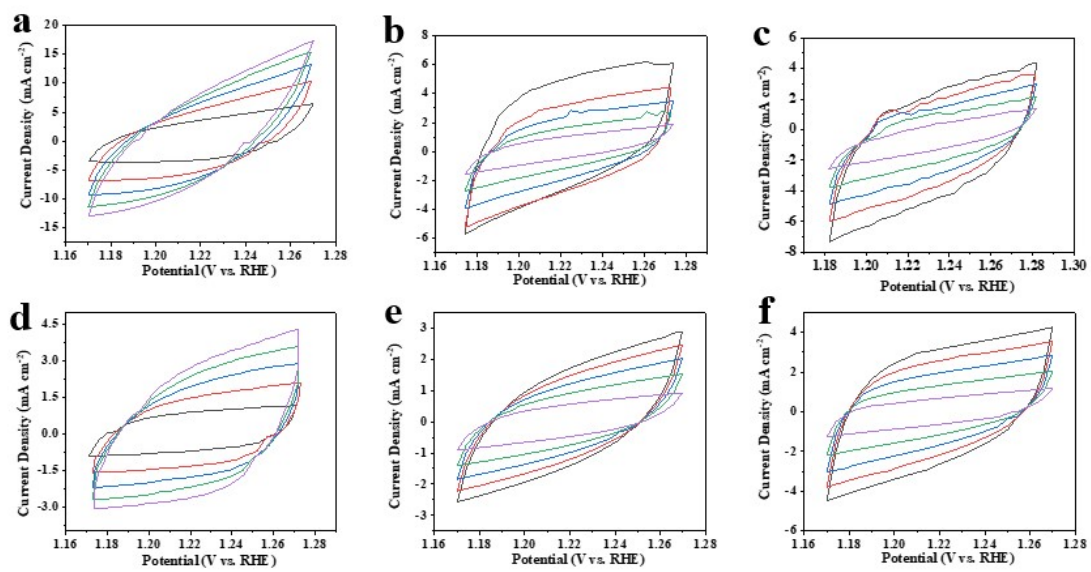

**Fig. S9** Cyclic voltammograms of (a) r-Ru/FeCoP, (b) r-Ru/FeCo-LDH, (c) Ru/FeCoP, (d) FeCoP, (e) r-Ru/FeCoP-1h, (f) r-Ru/FeCoP-3h at 1.16-1.30 V vs RHE at 40-200 mV s<sup>-1</sup> scan rate.

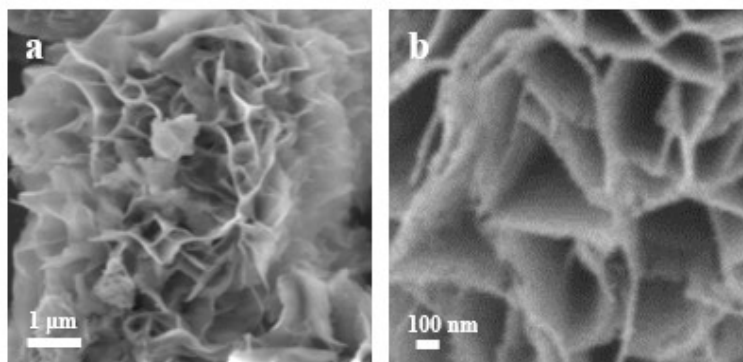

**Fig. S10** SEM images of r-Ru/FeCoP after HER reaction.

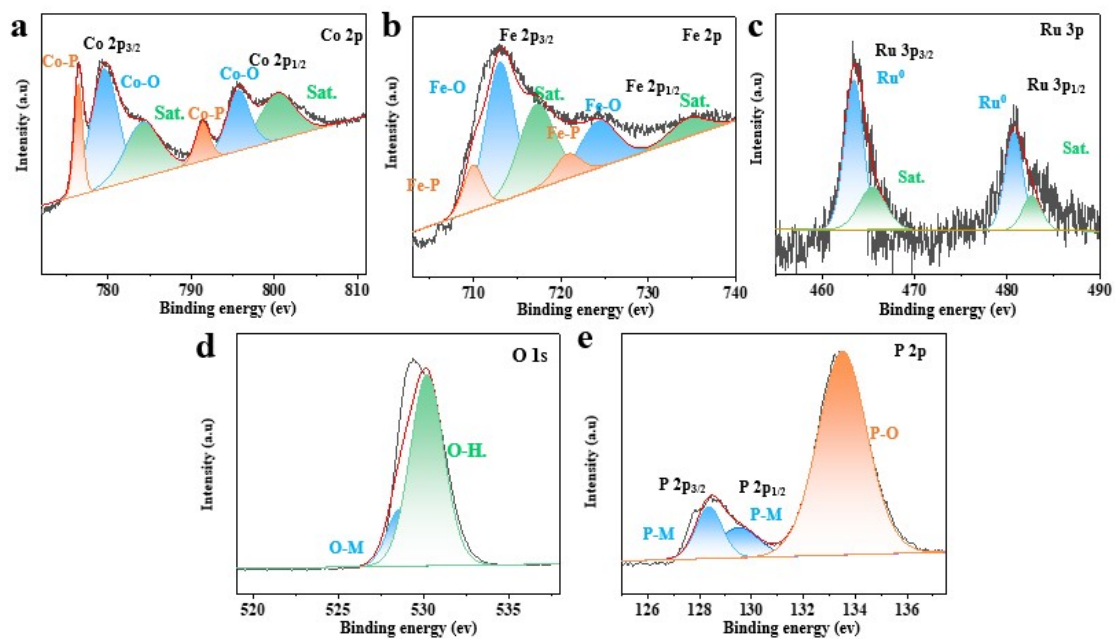

**Fig. S11** (a) Co 2p, (b) Fe 2p, (c) Ru 3p, (d) O 1s, and (e) P 2p XPS spectra of r-Ru/FeCoP after HER reaction.

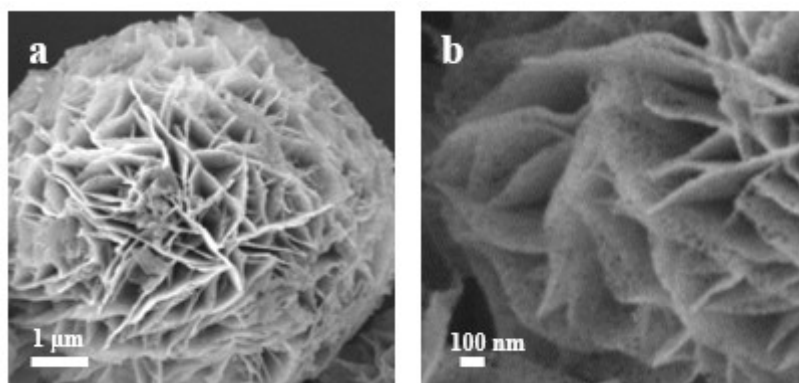

**Fig. S12** SEM images of r-Ru/FeCoP after OER reaction.

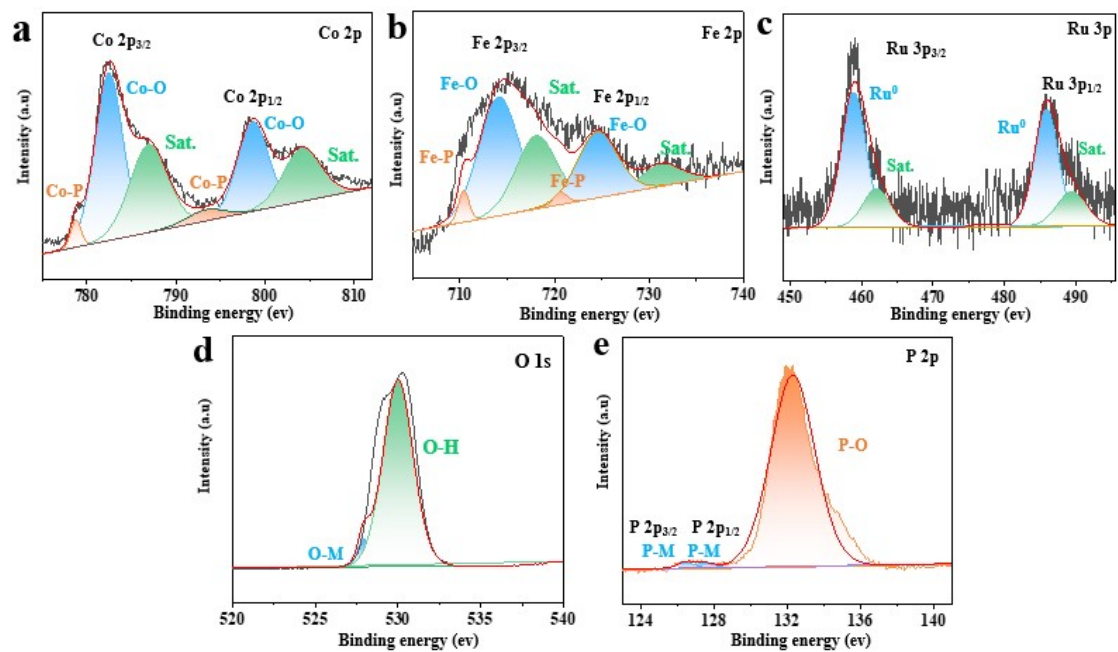

**Fig. S13** (a) Co 2p, (b) Fe 2p, (c) Ru 3p, (d) O 1s, and (e) P 2p XPS spectra of r-Ru/FeCoP after OER reaction.

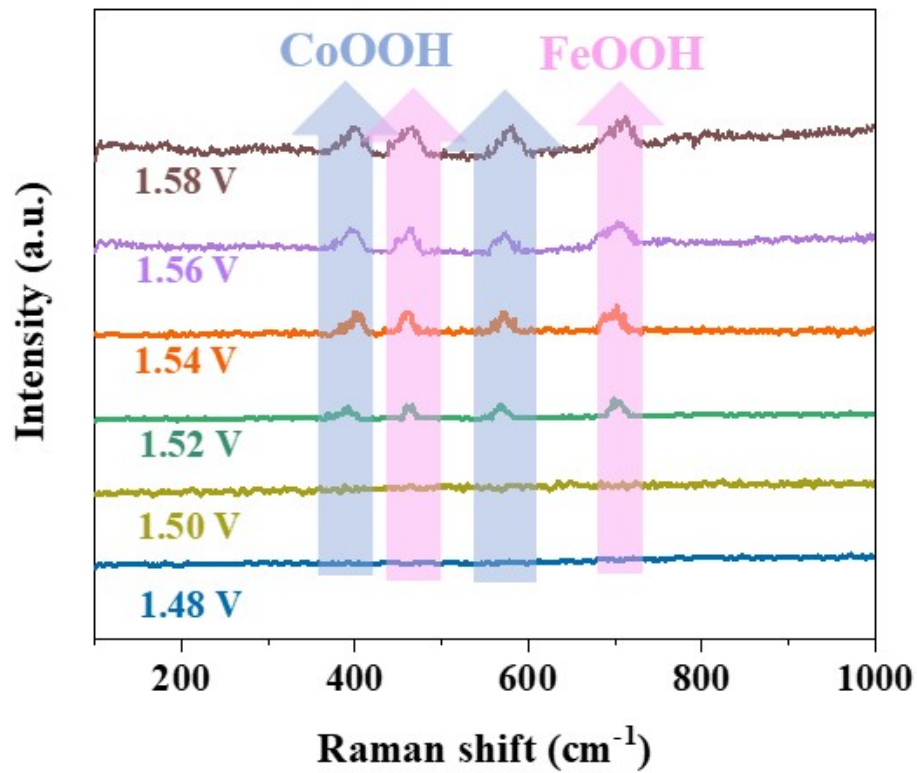

Fig. S14 In situ Raman spectra of r-Ru/FeCoP.

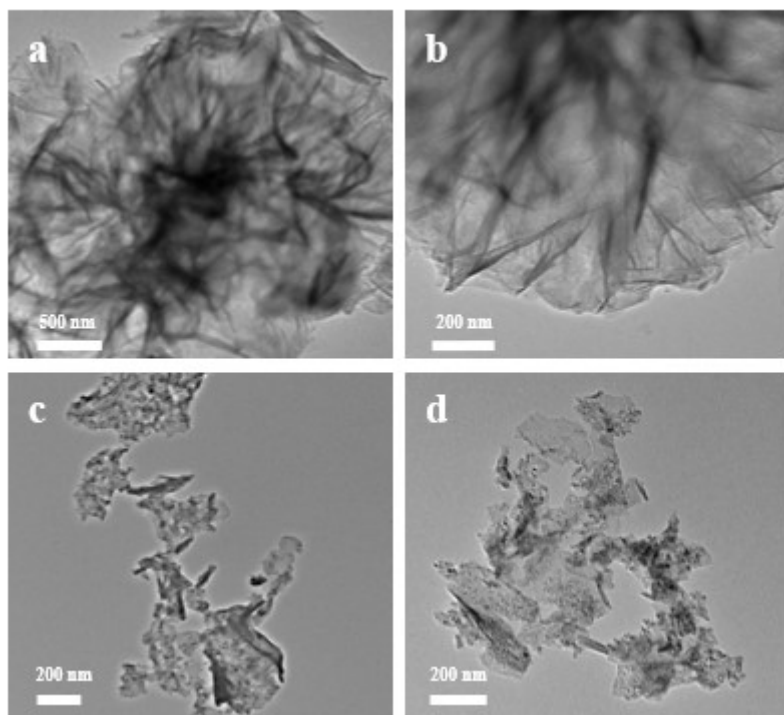

**Fig. S15** (a, b) TEM images of r-Ru/FeCoP-1h. (c, d) TEM images of r-Ru/FeCoP-3h.



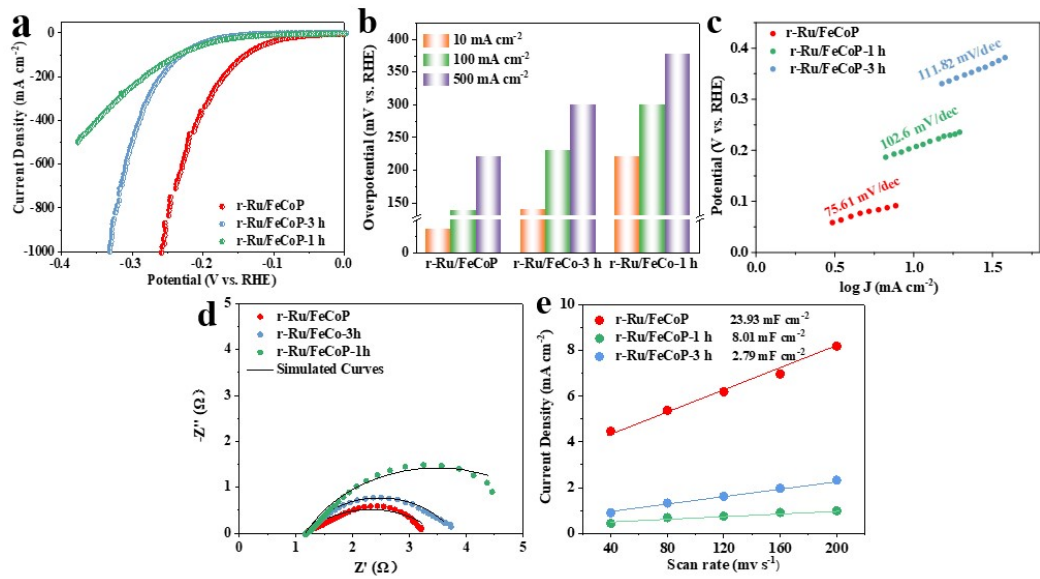

**Fig. S16** HER is manifested in 1.0 M KOH. (a) The HER polarization curves of r-Ru/FeCoP, r-Ru/FeCoP-1h, r-Ru/FeCoP-3h in 1.0 M KOH. (b)  $\eta_{10}$ ,  $\eta_{100}$ ,  $\eta_{500}$  overpotential comparison. (c) Tafel plots of r-Ru/FeCoP, r-Ru/FeCoP-1h, r-Ru/FeCoP-3h. (d) Nyquist plots of r-Ru/FeCoP, r-Ru/FeCoP-1h, r-Ru/FeCoP-3h. (e) The curves of the scanning rate of r-Ru/FeCoP, r-Ru/FeCoP-1h, and r-Ru/FeCoP-3h with capacitance current are shown.

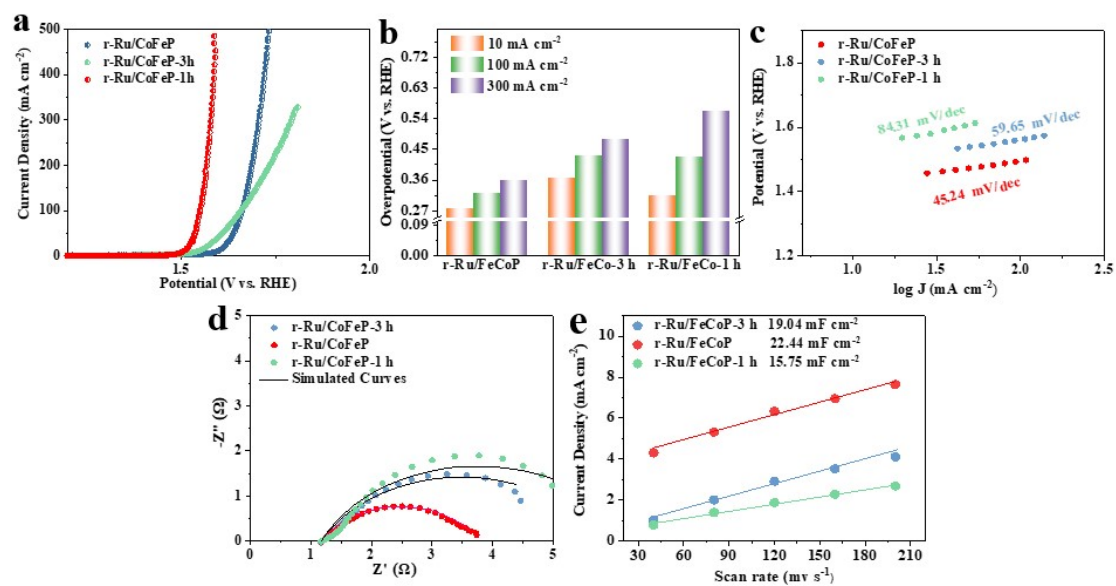

**Fig. S17** OER is manifested in 1.0 M KOH. (a) The HER polarization curves of r-Ru/FeCoP, r-Ru/FeCoP-1h, r-Ru/FeCoP-3h in 1.0 M KOH. (b)  $\eta_{10}$ ,  $\eta_{100}$ ,  $\eta_{500}$  overpotential comparison. (c) Tafel plots of r-Ru/FeCoP, r-Ru/FeCoP-1h, r-Ru/FeCoP-3h. (d) Nyquist plots of r-Ru/FeCoP, r-Ru/FeCoP-1h, r-Ru/FeCoP-3h. (e) The curves of the scanning rate of r-Ru/FeCoP, r-Ru/FeCoP-1h, and r-Ru/FeCoP-3h with capacitance current are shown.

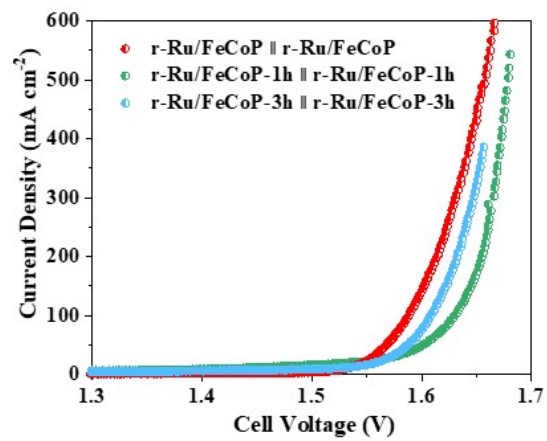

**Fig. S18** The total water decomposition diagrams of r-Ru/FeCoP-1h, r-Ru/FeCoP-3h and r-Ru/FeCoP were obtained.

**Table S1.** The content of Ru element in r-Ru/FeCoP and Ru/FeCoP catalysts obtained by ICP was analyzed.

| Electrocatalysts | Ru content (wt %) |
|------------------|-------------------|
| Ru/FeCoP         | 1.202             |
| r-Ru/FeCoP       | 2.35              |

**Table S2.** The fitted  $R_{ct}$  value of r-Ru/FeCoP catalyst and other comparative samples for HER and OER.

| Electrocatalysts | $R_{ct}$ for HER ( $\Omega$ ) | $R_{ct}$ for OER ( $\Omega$ ) |
|------------------|-------------------------------|-------------------------------|
| r-Ru/FeCoP       | 2.04                          | 2.63                          |
| r-Ru/FeCo-LDH    | 9.82                          | 3.33                          |
| Ru/FeCoP         | 16.82                         | 4.03                          |
| FeCoP            | 38.82                         | 9.83                          |

**Table S3.** The HER properties of r-Ru/FeCoP at 10 mA cm<sup>-2</sup> were compared with those of other works of literature.

| Electrocatalysts                                            | $\eta_{10}$ (mv) | Reference |
|-------------------------------------------------------------|------------------|-----------|
| r-Ru/FeCoP                                                  | 35.6             | This work |
| Ru/HNCS                                                     | 39               | S1        |
| Ru-Co <sub>3</sub> O <sub>4</sub>                           | 39               | S2        |
| Ru-G/CC                                                     | 40               | S3        |
| Ru <sub>2</sub> Ni <sub>2</sub> SNs/C                       | 40               | S4.       |
| Ru/PNC                                                      | 40               | S5        |
| a-Ru@Co-DHC                                                 | 40               | S6        |
| Pd <sub>0.24</sub> Cu <sub>0.29</sub> Ru <sub>0.47</sub> /C | 40.7             | S7        |
| Ru-CoP/CC                                                   | 44               | S8        |
| Ru-Si                                                       | 44               | S9        |
| Ru-CN-rGO                                                   | 45               | S10       |
| Ru@N/S/TiO <sub>2</sub> /rGO                                | 50               | S11       |
| RuMo/CNT                                                    | 50               | S12       |
| Ru-MoO <sub>2</sub>                                         | 51               | S13       |
| Ru@2H-MoS <sub>2</sub>                                      | 51               | S14       |
| Ru/CoO                                                      | 55               | S15       |
| Ru <sub>Sx</sub> /S-GO                                      | 58               | S16       |
| Ru-HPC                                                      | 61.6             | S17       |
| RuM-C (M= V, Mo, W, Zn, Cu)                                 | 65.78            | S18       |
| 2D-MoO <sub>2</sub> /Ru/NC                                  | 68               | S19       |
| 0.5Ru <sub>0.1</sub> Cu-GN1000                              | 68               | S20       |
| N-RuS <sub>2</sub> /Ru                                      | 76               | S21       |
| Ru/C <sub>3</sub> N <sub>4</sub> /C                         | 79               | S22       |
| Cu <sub>2x</sub> S@RuNPs                                    | 82               | S23       |
| Ru/Y(OH) <sub>3</sub> NHs                                   | 100              | S24       |

---

|                    |     |     |
|--------------------|-----|-----|
| SrRuO <sub>3</sub> | 110 | S25 |
| Ru/C               | 114 | S26 |
| Ru@COF-1           | 200 | S27 |

---

**Table S4.** The OER properties of r-Ru/FeCoP at 10 mA cm<sup>-2</sup> were compared with those of other works of literature.

| Electrocatalysts                                  | $\eta_{10}$ (mv) | Reference |
|---------------------------------------------------|------------------|-----------|
| r-Ru/FeCoP                                        | 276              | This work |
| Ru-Ni <sub>3</sub> S <sub>2</sub>                 | 330              | S28       |
| Ru@CN                                             | 330              | S29       |
| Ru/RuO <sub>2</sub> -MoO <sub>2</sub> -600        | 333              | S30       |
| Ru/N-BP2000                                       | 337              | S31       |
| Co/RuSAs-N-C                                      | 338              | S32       |
| Ni <sub>1.25</sub> Ru <sub>0.75</sub> P           | 340              | S33       |
| Ru-FeRu@C/NC                                      | 345              | S34       |
| Ru-NiFeLDH                                        | 346              | S35       |
| 1-RuO <sub>2</sub> /CeO <sub>2</sub>              | 350              | S36       |
| Ru@C <sub>2</sub> N                               | 350              | S37       |
| Ru <sub>2</sub> Ni <sub>2</sub> SNs               | 357              | S38       |
| 0.4-Ru@NG-750                                     | 372              | S39       |
| RuPbOx                                            | 390              | S40       |
| Ru@NG-4                                           | 400              | S41       |
| Pt <sub>53</sub> Ru <sub>39</sub> Ni <sub>8</sub> | 400              | S42       |
| NiRuO                                             | 410              | S43       |
| Ru <sup>0</sup> /CeO <sub>2</sub>                 | 420              | S44       |
| RuSAs-N-C                                         | 432              | S45       |
| Ru/C-TiO <sub>2</sub>                             | 440              | S46       |
| Ni/Ru=0.85                                        | 457              | S47       |
| Ni/Ru=0.36                                        | 504              | S47       |
| La <sub>2</sub> O <sub>3</sub> -Gra               | 570              | S48       |
| RuO <sub>2</sub> -MoO <sub>2</sub>                | 540              | S48       |
| Ru/C                                              | 547              | S26       |
| Ni/Ru=0.19                                        | 570              | S47       |



---

|                     |     |     |
|---------------------|-----|-----|
| Ru-MoO <sub>2</sub> | 570 | S13 |
| RuCo@NC-600         | 660 | S49 |

---

**Table S5.** The content of Ru element in r-Ru/FeCoP and after HER obtained by ICP was analyzed.

| Electrocatalysts     | Ru content (wt %) |
|----------------------|-------------------|
| r-Ru/FeCoP           | 2.35              |
| r-Ru/FeCoP after HER | 2.32              |

**Table S6.** Comparison of the potentials of r-Ru/FeCoP||r-Ru/FeCoP two-electrode and recently reported TMNs two-electrode for overall water splitting at 10 mA cm<sup>-2</sup> in 1.0 M KOH solution.

| Electrocatalysts                                                                                    | $\eta_{10}$ (V) | References |
|-----------------------------------------------------------------------------------------------------|-----------------|------------|
| r-Ru/FeCoP  r-Ru/FeCoP                                                                              | 1.53            | This work  |
| Ru-NiSe <sub>2</sub> /NF  Ru-NiSe <sub>2</sub> /NF                                                  | 1.537           | S50        |
| Ru-RuO <sub>2</sub> /Mn  Ru-RuO <sub>2</sub> /Mn                                                    | 1.54            | S51        |
| Co-RuO <sub>2</sub> NWs  Co-RuO <sub>2</sub> NWs                                                    | 1.54            | S52        |
| Ni <sub>3</sub> N/Ru/NCAC  Ni <sub>3</sub> N/Ru/NCAC                                                | 1.55            | S53        |
| NiO@Ru  NiO@Ru                                                                                      | 1.55            | S54        |
| RuP/CoNiP <sub>4</sub> O <sub>12</sub>   RuP/CoNiP <sub>4</sub> O <sub>12</sub>                     | 1.56            | S55        |
| Ru@BS-5  Ru@BS-5                                                                                    | 1.56            | S56        |
| Ru-SA/Ti <sub>3</sub> C <sub>2</sub> Tx  Ru-SA/Ti <sub>3</sub> C <sub>2</sub> Tx                    | 1.56            | S57        |
| CoFeRu@C  CoFeRu@C                                                                                  | 1.59            | S58        |
| Pt-C/NF//RuO <sub>2</sub> /NF  Pt-C/NF//RuO <sub>2</sub> /NF                                        | 1.64            | S59        |
| RuO <sub>2</sub> /Co <sub>3</sub> O <sub>4</sub>   RuO <sub>2</sub> /Co <sub>3</sub> O <sub>4</sub> | 1.645           | S60        |
| Ru-FeCoP  Ru-FeCoP                                                                                  | 1.65            | S61        |

**Table S7.** The ICP result of Ru element in r-Ru/FeCoP-1h and r-Ru/FeCoP-3h catalysts obtained by ICP was analyzed.

| Electrocatalysts | Ru content (wt %) |
|------------------|-------------------|
| r-Ru/FeCoP-1h    | 1.82              |
| r-Ru/FeCoP-3h    | 2.81              |

## References

- S1 H. Du, Z. Du, T. Wang, B. Li, S. He, K. Wang, L. Xie, W. Ai, W. Huang. Unlocking Interfacial Electron Transfer of Ruthenium Phosphides by Homologous Core-Shell Design toward Efficient Hydrogen Evolution and Oxidation. *Adv. Mater* **2022**, *34*, 2204624.
- S2 Y. Wang, S. Wang, Z.L. Ma, L.T. Yan, X.B. Zhao, Y.Y. Xue, J.M. Huo, X. Yuan, S.N. Li, Q.G. Zhai. Competitive Coordination-Oriented Monodispersed Ruthenium Sites in Conductive MOF/LDH Hetero-Nanotree Catalysts for Efficient Overall Water Splitting in Alkaline Media. *Adv. Mater*, **2022**, *34*, 2107488.
- S3 Y. Jiang, T.W. Huang, H.L. Chou, L. Zhou, S.W. Lee, K.W. Wang, S. Dai. Revealing and magnifying interfacial effects between ruthenium and carbon supports for efficient hydrogen evolution. *J. Mater. Chem. A*, **2022**, *10*, 17730-17739.
- S4 Y. Wang, H. Lv, L. Sun, F. Jia, B. Liu. Ordered Mesoporous Intermetallic Trimetals for Efficient and pH-Universal Hydrogen Evolution Electrocatalysis. *Adv. Energy Mater*, **2022**, *12*, 2201478.
- S5 J. Cai, J. Yang, X. Xie, J. Ding, L. Liu, W.Y. Liu, Z. Tang, B. Liu, S. Lu. Carbon Doping Triggered Efficient Electrochemical Hydrogen Evolution of Cross-Linked Porous Ru-MoO<sub>2</sub> Via Solid-Phase Reaction Strategy. *Energy Environ. Mater*, **2023**, *6*, e12424.
- S6 G.Z. Pu, T. Liu, G. Zhang, Z. Chen, D.S. Li, N. Chen, W. Chen, Z. Chen, S. Sun. General Synthesis of Transition-Metal-Based Carbon-Group Intermetallic Catalysts for Efficient Electrocatalytic Hydrogen Evolution in Wide pH Range. *Adv. Energy Mater*, **2022**, *12*, 2200293.
- S7 Q. Liang, Q. Li, L. Xie, H. Zeng, S. Zhou, Y. Huang, M. Yan, X. Zhang, T. Liu, J. Zeng, K. Liang, O. Terasaki, D. Zhao, L. Jiang, B. Kong. Superassembly of Surface-Enriched Ru Nanoclusters from Trapping-Bonding Strategy for Efficient Hydrogen Evolution. *ACS nano*, **2022**, *16*, 7993-8004.
- S8 J. Jiao, N.N. Zhang, C. Zhang, N. Sun, Y. Pan, C. Chen, J. Li, M. Tan, R. Cui, Z. Shi, J. Zhang, H. Xiao, T. Lu. Doping Ruthenium into Metal Matrix for Promoted pH-

- Universal Hydrogen Evolution. *Adv. Sci.*, **2022**, *9*, 2200010.
- S9 D. Chen, R. Yu, R. Lu, Z. Pu, P. Wang, J. Zhu, J. Pi, D. Wu, J. Wu, Y. Zhao, Z. Kou, J. Yu, S. Mu. Tunable Ru-Ru<sub>2</sub>P heterostructures with charge redistribution for efficient pH-universal hydrogen evolution. *InfoMat*, **2022**, *4*, e12287.
- S10 H. Yao, X. Wang, K. Li, C. Li, C. Zhang, J. Zhou, Z. Cao, H. Wang, M. Gu, M. Huang, H. Jiang. Strong electronic coupling between ruthenium single atoms and ultrafine nanoclusters enables economical and effective hydrogen production. *Appl. Catal. B*, **2022**, *312*, 121378.
- S11 J. Li, Y. Li, J. Wang, C. Zhang, H. Ma, C. Zhu, D. Fan, Z. Guo, M. Xu, Y. Wang, H. Ma. Elucidating the Critical Role of Ruthenium Single Atom Sites in Water Dissociation and Dehydrogenation Behaviors for Robust Hydrazine Oxidation-Boosted Alkaline Hydrogen Evolution. *Adv. Funct. Mater.*, **2022**, *32*, 2109439.
- S12 L. Li, L. Bu, B. Huang, P. Wang, C. Shen, S. Bai, T.S. Chan, Q. Shao, Z. Hu, X. Huang. Compensating Electronic Effect Enables Fast Site-to-Site Electron Transfer over Ultrathin RuMn Nanosheet Branches toward Highly Electroactive and Stable Water Splitting. *Adv. Mater.*, **2021**, *33*, 2105308.
- S13 Y. Wu, W. Wei, R. Yu, L. Xia, X. Hong, J. Zhu, J. Li, L. Lv, W. Chen, Y. Zhao, L. Zhou, L. Mai. Anchoring Sub-Nanometer Pt Clusters on Crumpled Paper-Like MXene Enables High Hydrogen Evolution Mass Activity. *Adv. Funct. Mater.*, **2022**, *32*, 2110910.
- S14 X. Jin, H. Jang, N. Jarulertwathana, M.G. Kim, S.J. Hwang. Atomically Thin Holey Two-Dimensional Ru<sub>2</sub>P Nanosheets for Enhanced Hydrogen Evolution Electrocatalysis. *ACS nano*, **2022**, *16*, 16452-16461.
- S15 W. Feng, Y. Feng, J. Chen, H. Wang, Y. Hu, T. Luo, C. Yuan, L. Cao, L. Feng, J. Huang. Interfacial electronic engineering of Ru/FeRu nanoparticles as efficient trifunctional electrocatalyst for overall water splitting and Zn-air battery. *Chem. Eng. J.*, **2022**, *437*, 135456.
- S16 R. Jiang, Y. Da, J. Zhang, H. Wu, B. Fan, J. Li, J. Wang, Y. Deng, X. Han, W. Hu. Non-equilibrium synthesis of stacking faults-abundant Ru nanoparticles towards electrocatalytic water splitting. *Appl. Catal. B*, **2022**, *316*, 121682.

S17 Z. Pu, J. Zhao, I.S. Amiinu, W. Li, M. Wang, D. He, S. Mu. A universal synthesis strategy for P-rich noble metal diphosphide-based electrocatalysts for the hydrogen evolution reaction. *Energy Environ. Sci*, **2019**, *12*, 952-957.

S18 S. Wang, B. Xu, W. Huo, H. Feng, X. Zhou, F. Fang, Z. Xie, J.K. Shang, J. Jiang. Efficient FeCoNiCuPd thin-film electrocatalyst for alkaline oxygen and hydrogen evolution reactions. *Appl. Catal. B*, **2022**, *313*, 121472.

S19 C. Zhou, X. Chen, S. Liu, Y. Han, H. Meng, Q. Jiang, S. Zhao, F. Wei, J. Sun, T. Tan, R. Zhang. Superdurable Bifunctional Oxygen Electrocatalyst for High-Performance Zinc-Air Batteries. *J. Am. Chem. Soc*, **2022**, *144*, 2694-2704.

S20 B. Zhang, J. Shan, X. Wang, Y. Hu, Y. Li. Ru/Rh Cation Doping and Oxygen-Vacancy Engineering of FeOOH Nanoarrays@Ti<sub>3</sub>C<sub>2</sub>T<sub>x</sub> MXene Heterojunction for Highly Efficient and Stable Electrocatalytic Oxygen Evolution. *Small*, **2022**, *18*, 2200173.

S21 H. Song, J. Yu, Z. Tang, B. Yang, S. Lu. Halogen-Doped Carbon Dots on Amorphous Cobalt Phosphide as Robust Electrocatalysts for Overall Water Splitting. *Adv. Energy Mater*, **2022**, *12*, 2102573.

S22 Q. Quan, Y. Zhang, F. Wang, X. Bu, W. Wang, Y. Meng, P. Xie, D. Chen, W. Wang, D. Li, C. Liu, S. Yip, J.C. Ho. Topochemical domain engineering to construct 2D mosaic heterostructure with internal electric field for high-performance overall water splitting. *Nano Energy*, **2022**, *101*, 107566.

S23 X. Zheng, Y. Cao, Z. Wu, W. Ding, T. Xue, J. Wang, Z. Chen, X. Han, Y. Deng, W. Hu. Rational Design and Spontaneous Sulfurization of NiCo-(oxy)Hydroxysulfides Nanosheets with Modulated Local Electronic Configuration for Enhancing Oxygen Electrocatalysis. *Adv. Energy Mater*, **2022**, *12*, 2103275.

S24 H. Su, S. Song, Y. Gao, N. Li, Y. Fu, L. Ge, W. Song, J. Liu, T. Ma. In Situ Electronic Redistribution Tuning of NiCo<sub>2</sub>S<sub>4</sub> Nanosheets for Enhanced Electrocatalysis. *Adv. Funct. Mater*, **2022**, *32*, 2109731.

S25 M. Gu, X. Deng, M. Lin, H. Wang, A. Gao, X. Huang, X. Zhang. Ultrathin NiCo Bimetallic Molybdate Nanosheets Coated CuO<sub>x</sub> Nanotubes: Heterostructure and Bimetallic Synergistic Optimization of the Active Site for Highly Efficient Overall

- Water Splitting. *Adv. Energy Mater*, **2021**, *11*, 2102361.
- S26 C. Rong, X. Shen, Y. Wang, L. Thomsen, T. Zhao, Y. Li, X. Lu, R. Amal, C. Zhao. Electronic Structure Engineering of Single-Atom Ru Sites via Co-N<sub>4</sub> Sites for Bifunctional pH-Universal Water Splitting. *Adv. Mater*, **2022**, *34*, 2110103.
- S27 Y. Song, J. Cheng, J. Liu, Q. Ye, X. Gao, J. Lu, Y. Cheng. Modulating electronic structure of cobalt phosphide porous nanofiber by ruthenium and nickel dual doping for highly-efficiency overall water splitting at high current density. *Appl. Catal. B*, **2021**, *298*, 120488.
- S28 V.H. Hoa, D.T. Tran, S. Prabhakaran, D.H. Kim, N. Hameed, H. Wang, N.H. Kim, J.H. Lee. Ruthenium single atoms implanted continuous MoS<sub>2</sub>-Mo<sub>2</sub>C heterostructure for high-performance and stable water splitting. *Nano Energy*, **2021**, *88*, 106277.
- S29 C.B. Hong, X. Li, W.B. Wei, X.T. Wu, Q.L. Zhu. Nano-engineering of Ru-based hierarchical porous nanoreactors for highly efficient pH-universal overall water splitting. *Appl. Catal. B*, **2021**, *294*, 120230.
- S30 L. Huang, R. Yao, X. Wang, S. Sun, X. Zhu, X. Liu, M.G. Kim, J. Lian, F. Liu, Y. Li, H. Zong, S. Han, X. Ding. In situ phosphating of Zn-doped bimetallic skeletons as a versatile electrocatalyst for water splitting. *Energy Environ. Sci*, **2022**, *15*, 2425-2434.
- S31 Q. Gao, W. Luo, X. Ma, Z. Ma, S. Li, F. Gou, W. Shen, Y. Jiang, R. He, M. Li. Electronic modulation and vacancy engineering of Ni<sub>9</sub>S<sub>8</sub> to synergistically boost efficient water splitting: Active vacancy-metal pairs. *Appl. Catal. B*, **2022**, *310*, 121356.
- S32 H. Zhang, C. Chen, X. Wu, C. Lv, Y. Lv, J. Guo, D. Jia. Synergistic Incorporating RuO<sub>2</sub> and NiFeOOH Layers onto Ni<sub>3</sub>S<sub>2</sub> Nanoflakes with Modulated Electron Structure for Efficient Water Splitting. *Small Methods*, **2022**, *6*, 2200483
- S33 Zhang H, Aierke A, Zhou Y, Ni Z, Feng L, Chen A, Wågberg T, Hu G. A high-performance transition-metal phosphide electrocatalyst for converting solar energy into hydrogen at 19.6% STH efficiency. *Carbon Energy*, **2022**, *5*, e217.
- S34 S. Yan, W. Liao, M. Zhong, W. Li, C. Wang, N. Pinna, W. Chen, X. Lu. Partially oxidized ruthenium aerogel as highly active bifunctional electrocatalyst for overall water splitting in both alkaline and acidic media. *Appl. Catal. B*, **2022**, *307*, 121199.
- S35 X. Mu, X. Gu, S. Dai, J. Chen, Y. Cui, Q. Chen, M. Yu, C. Chen, S. Liu, S. Mu.



Breaking the symmetry of single-atom catalysts enables an extremely low energy barrier and high stability for large-current-density water splitting. *Energy Environ. Sci*, **2022**, *15*, 4048-4057.

S36 S.W. Wu, S.Q. Liu, X.H. Tan, W.Y. Zhang, K. Cadien, Z. Li. Ni<sub>3</sub>S<sub>2</sub>-embedded NiFe LDH porous nanosheets with abundant heterointerfaces for high-current water electrolysis. *Chem. Eng. J*, **2022**, *442*, 136105.

S37 P. Zhai, M. Xia, Y. Wu, G. Zhang, J. Gao, B. Zhang, S. Cao, Y. Zhang. Z. Li, Z. Fan, C. Wang, X. Zhang, J.T. Miller, L. Sun, J. Hou. Engineering single-atomic ruthenium catalytic sites on defective nickel-iron layered double hydroxide for overall water splitting. *Nat. Commun*, **2021**, *12*, 4587.

S38 S. Yang, J.Y. Zhu, X.N. Chen, M.J. Huang, S.H. Cai, J.Y. Han, J.S. Li. Self-supported bimetallic phosphides with artificial heterointerfaces for enhanced electrochemical water splitting. *Appl. Catal. B*, **2022**, *304*, 120914.

S39 L. Bai, Z. Duan, X. Wen, R. Si, Q. Zhang, J. Guan. Highly dispersed ruthenium-based multifunctional electrocatalyst. *ACS Catalysis*, 2019, *9*, 9897-9904

S40 Huang R, Wen Y, Peng H, Zhang B. Improved kinetics of OER on Ru-Pb binary electrocatalyst by decoupling proton-electron transfer. *Chinese Journal of Catalysis*, **2022**, *43*, 130-138.

S41 B.K. Barman, D. Das, K.K. Nanda. Facile synthesis of ultrafine Ru nanocrystal supported N-doped graphene as an exceptional hydrogen evolution electrocatalyst in both alkaline and acidic media. *Sustainable Energy & Fuels*, **2017**, *1*, 1028-1033.

S42 Y.C. Shi, T. Yuan, J.J. Feng, J. Yuan, A.J. Wang. Rapid fabrication of support-free trimetallic Pt<sub>53</sub>Ru<sub>39</sub>Ni<sub>8</sub> nanosponges with enhanced electrocatalytic activity for hydrogen evolution and hydrazine oxidation reactions. *Journal of colloid and interface science*, **2017**, *505*, 14-22.

S43 S. Datta, F. Pettersson, S. Ganguly, H. Saxén, N. Chakraborti. Designing high strength multi-phase steel for improved strength–ductility balance using neural networks and multi-objective genetic algorithms. *ISIJ international*, **2007**, *47*, 1195-1203.

S44 S. Akbayrak, Y. Tonbul, S. Özkar. Ceria-supported ruthenium nanoparticles as

highly active and long-lived catalysts in hydrogen generation from the hydrolysis of ammonia borane. *Dalton Transactions*, **2016**, 45, 10969-10978.

S45 Z. Han, P. Wu, M. He, X. Zhuang, H. Lin, S. Han. Ammonia synthesis by electrochemical nitrogen reduction reaction-A novel energy storage way. *Journal of Energy Storage*, **2022**, 55, 105684.

S46 H. Zhang, G. Li, R. Nie, X. Lu, Q. Xia. One-pot synthesized mesoporous C-TiO<sub>2</sub> hybrid for Ru-catalyzed low-temperature hydrogenation of benzoic acid. *Journal of Materials Science*, **2019**, 54, 7529-7540.

S47 S. Zhou, L. Jin, P. Gu, L. Tian, N. Li, D. Chen, A. Marcomini, Q. Xu, J. Lu. Novel calixarene-based porous organic polymers with superfast removal rate and ultrahigh adsorption capacity for selective separation of cationic dyes. *Chemical Engineering Journal*, **2022**, 433, 134442.

S48 D. Wang, L. Jin, M. Liu, T.G. Lee, S.G. Peera, C. Liu. The graphene-supported Lanthanum oxide cluster as efficient bifunctional electrocatalyst for oxygen reaction. *Molecular Catalysis*, **2023**, 535, 112879.

S49 F. Zhang, Y. Zhu, Y. Chen, Y. Lu, Q. Lin, L. Zhang, S. Tao, X. Zhang, H. Wang. RuCo alloy bimodal nanoparticles embedded in N-doped carbon: a superior pH-universal electrocatalyst outperforms benchmark Pt for the hydrogen evolution reaction. *Journal of Materials Chemistry A*, **2020**, 8, 12810-12820.

S50 R. Qin, P. Wang, Z.L. Li, J.X. Zhu, F. Cao, H. W. Xu, Q.L. Ma, J.Y. Zhang, J. Yu. MuRu-Incorporated Nickel Diselenide Nanosheet Arrays with Accelerated Adsorption Kinetics toward Overall Water Splitting. *Small*, **2021**.

S51 X. Xie, X. Zhang, W. Tian, X. Zhang, J. Ding, Y. Liu, S. Lu. Tri-functional Ru-RuO<sub>2</sub>/Mn-MoO<sub>2</sub> composite: A high efficient electrocatalyst for overall water splitting and rechargeable Zn-air batteries. *Chemical Engineering Journal*, **2023**, 468, 143-760.

S52 J. Wang, Y. Ji, R. Yin, Y. Li, Q. Shao, X. Huang. Transition metal-doped ultrathin RuO<sub>2</sub> networked nanowires for efficient overall water splitting across a broad pH range. *Journal of Materials Chemistry A*, 2019, 7, 6411-6416.

S53 X. Zhao, X. Yong, Q. Ji, Z. Yang, Y. Song, Y. Sun, Z. Cai, J. Xu, L. Li, S. Shi, F. Chen, C. Li, P. Wang, J.-B. Baek. Controlled synthesis of highly active bifunctional

electrocatalysts for overall water splitting using coal-based activated carbons. *Journal of Materials Chemistry A*, 2023, 11, 12726-12734.

S54 L. Zhang, Z. Hu, H. Li, Q. Ren, S. Hu. Nickel Foam Supported NiO@Ru Heterostructure towards High-efficiency Overall Water Splitting. *Chem Phys Chem*, 2021.

S55 J. Zhao, Y. Zhang, Y. Xia, B. Zhang, Y. Du, B. Song, H.-L. Wang, S. Li, P. Xu, Strong phosphide-metaphosphate interaction in RuP/CoNiP<sub>4</sub>O<sub>12</sub> for enhanced electrocatalytic water splitting. *Applied Catalysis B*, 2023, 328 122-447.

S56 S. Tang, Z. Liu, F. Qiu, Q. Liu, Y. Mao, L. Zhang. The active ruthenium (101) crystal plane selectively exposed by in situ metal hyperaccumulation on a living plant for overall water splitting. *Green Chemistry*, 2022, 24 9668-9676.

S57 S. Yang, J.-Y. Zhu, X.-N. Chen, M.-J. Huang, S.-H. Cai, J.-Y. Han, J.-S. Li. Self-supported bimetallic phosphides with artificial heterointerfaces for enhanced electrochemical water splitting. *Applied Catalysis B*, 2022, 304, 120914.

S58 M. Yang, T. Feng, Y. Chen, J. Liu, X. Zhao, B. Yang. Synchronously integration of Co, Fe dual-metal doping in Ru@C and CDs for boosted water splitting performances in alkaline media. *Applied Catalysis B*, 2020, 267, 118657.

S59 H. Liu, X. Ma, H. Hu, Y. Pan, M. Wu. Robust NiCoP/CoP Heterostructures for Highly Efficient Hydrogen Evolution Electrocatalysis in Alkaline Solution. *ACS Applied Materials & Interfaces*, 2019, 11.

S60 Q. Su, R. Sheng, Q. Liu, J. Ding, P. Wang, X. Wang, J. Wang, Y. Wang, B. Wang, Y. Huang. Surface reconstruction of RuO<sub>2</sub>/Co<sub>3</sub>O<sub>4</sub> amorphous-crystalline heterointerface for efficient overall water splitting. *Journal of Colloid and Interface Science*, 2023.

S61 L. Zhang, X. Cao, C. Guo, A. Hassan, Y. Zhang, J. Wang. Interface and morphology engineering of Ru-FeCoP hollow nanocages as alkaline electrocatalyst for overall water splitting. *Journal of Environmental Chemical Engineering*, 2023, 11, 111373.

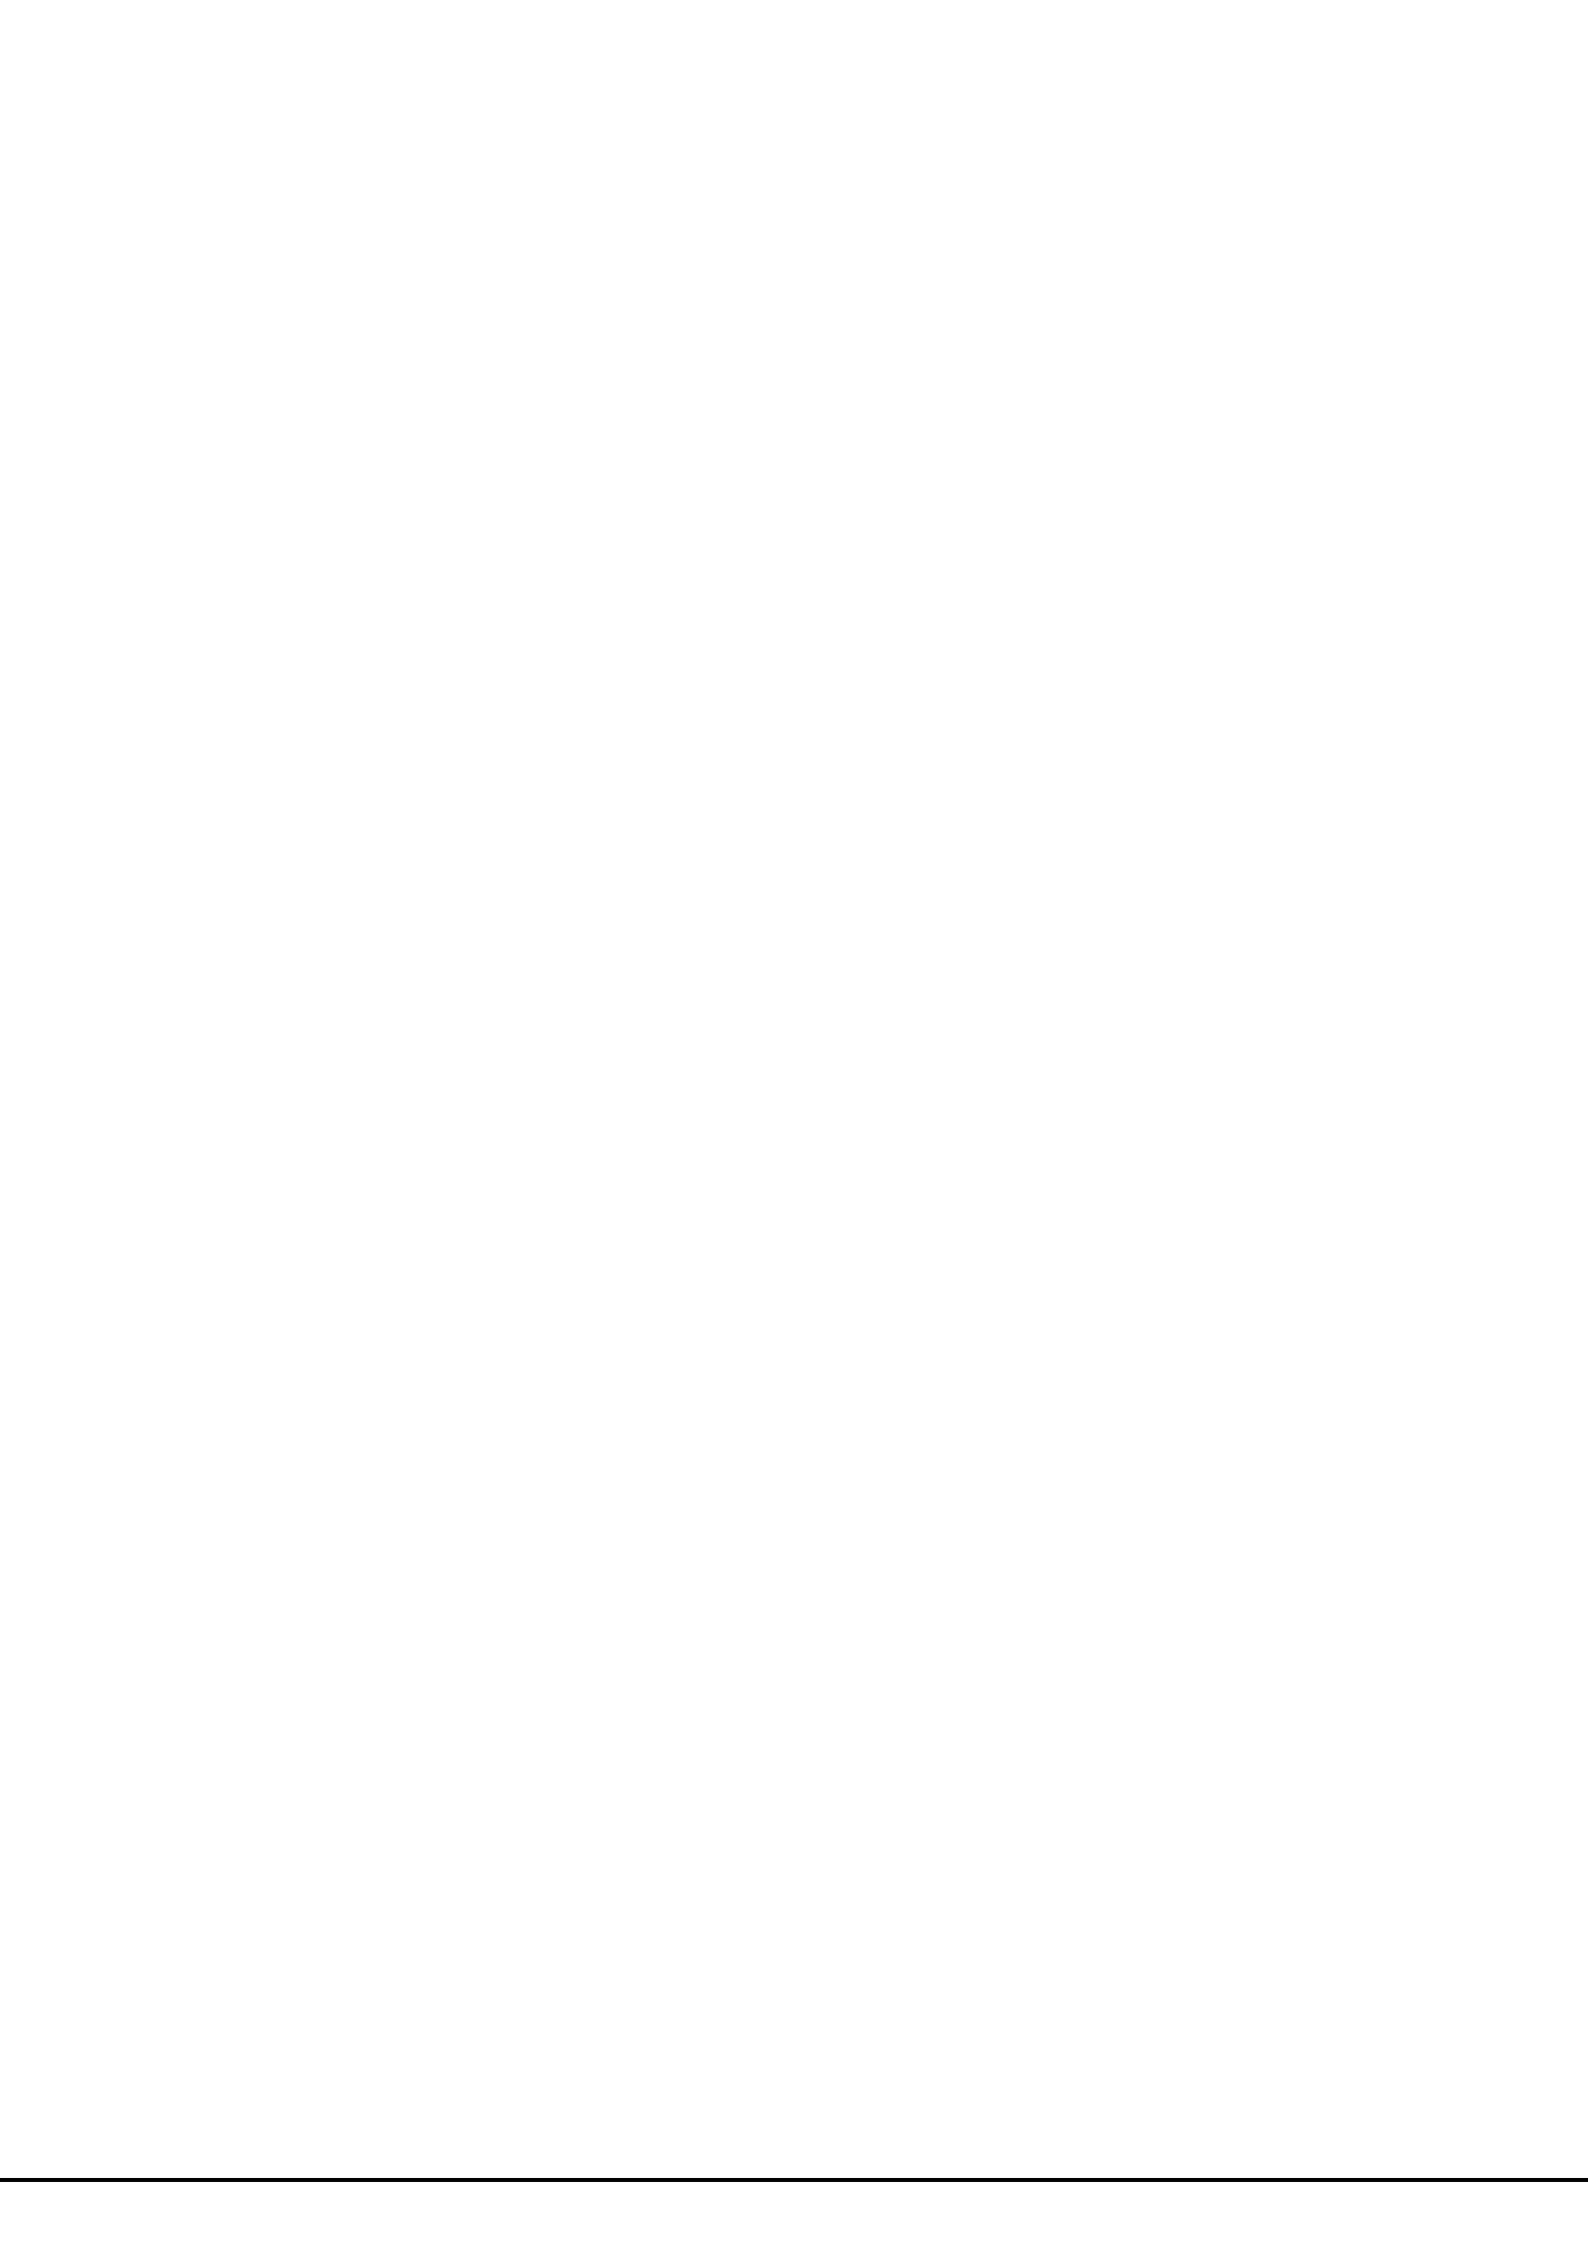

Supplement: d3nr05786k1.pdf [file d3nr05786k1.pdf]
